# Supplementary material
Source: publisher figshare collection journal article supplement (https://gsapubs.figshare.com/articles/dataset/_/12535448)
Supplement: Supplementary file 1 [file 1]

Polyak et al., 2017, Rapid speleothem  $\delta^{13}\text{C}$  change in southwestern North America coincident with Greenland stadial 20 and the Toba (Indonesia) supereruption: *Geology*, doi:10.1130/G39149.1.

## METHODS

**Uranium (U)-series.** U-series isotope measurements were made at the Radiogenic Isotope Laboratory, University of New Mexico. Subsample powders (100 to 170 mg) were drilled and dissolved in concentrated nitric acid, and then spiked with a mixed solution of  $^{229}\text{Th}$ - $^{233}\text{U}$ - $^{236}\text{U}$ . U and Th were separated using conventional anion-exchange chromatography (Asmerom et al., 2010). U and Th measurements were made on a Thermo Neptune multicollector inductively coupled plasma mass spectrometer (MC-ICPMS). The MC-ICPMS measurements were run in static mode using a mix of  $10^{11}$  and  $10^{12}$   $\Omega$  resistors in conjunction with five Faraday cup detectors and an ion-counting secondary electron multiplier detector. A NBL-112 II (also known as CRM-145) U isotope standard was measured with the samples, yielding a  $\delta^{234}\text{U}$  value of  $-38.0$ . U and Th procedural blanks were in the range of 5–10 pg and therefore have no effect on ages. The analytical uncertainties are  $2\sigma$  of the mean. The age uncertainties include analytical errors and uncertainties in the initial  $^{230}\text{Th}/^{232}\text{Th}$  ratios. Initial  $^{230}\text{Th}/^{232}\text{Th}$  ratios were corrected using an empirical value of  $30 \pm 15$  ppm, allowing for a range of contributions, from silicate to carbonate materials. The sample is very clean and thus not sensitive to initial  $^{230}\text{Th}$  correction, in addition to the fact that the samples are older than 10 kyrs. The sample and U-series growth curve are shown in Figure DR1.

**Stable isotopes.** Powders for  $\delta^{18}\text{O}$  analysis were sampled along the stalagmite growth axis at 1 mm intervals and were analyzed at the Las Vegas Isotope Science Lab (LVIS) of the University of Nevada, Las Vegas. Stalagmite powders were reacted with three drops of anhydrous phosphoric acid at  $70^\circ\text{C}$  in a Thermo Electron Kiel-IV automated carbonate preparation device coupled to a Delta V Plus mass spectrometer. Values are reported in standard permil (‰) notation with respect to Vienna Pee Dee Belemnite (VPDB). Internal standard precision is better than  $0.08$  ‰  $\delta^{18}\text{O}$ .

**Subsampling for U-series.** Sample trenches were milled using a 1 mm diameter bit with resultant trench widths of 1.2 mm. The growth rate of KR-1 through this region of the stalagmite is  $0.0075$  mm/yr (133 years/mm). An additional maximum error equal to half of the trench width (0.6 mm) is 80 years, was added to the U-series error ( $191 + 80 = 271$  years) for the age measured at the initiation of GS-20. We interpret the timing of rapid rise in  $\delta^{13}\text{C}$  to be  $74190 \pm 220$  yr B.P. COPRA was used to construct the age model. An age model using multiple polynomial curves was also constructed and both curves compared well (Figure DR2).

**Figure DR1.** Stalagmite KR-1 consists mostly of pre-penultimate glacial growth with the most recent growth branching from the main part of the stalagmite as shown in this figure. Except for the top 22 mm (hiatus shown in gold), this part of the stalagmite grew from 87 to 69 ka, and the uranium-series chronology supports continuous growth through this section of the stalagmite. Sample trenches are 1.2 mm wide and drilled along growth layers. Circles are added sample sites for  $\delta^{234}\text{U}$  measurements.

The graph below shows the uranium-series chronology tied to distance below stalagmite top, and exhibits the growth rate character of the stalagmite, which is near linear around the Toba super-eruption time.

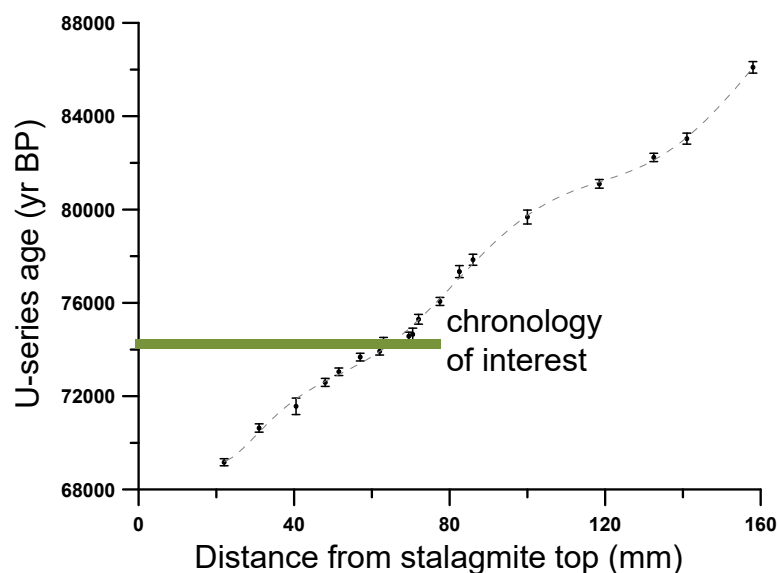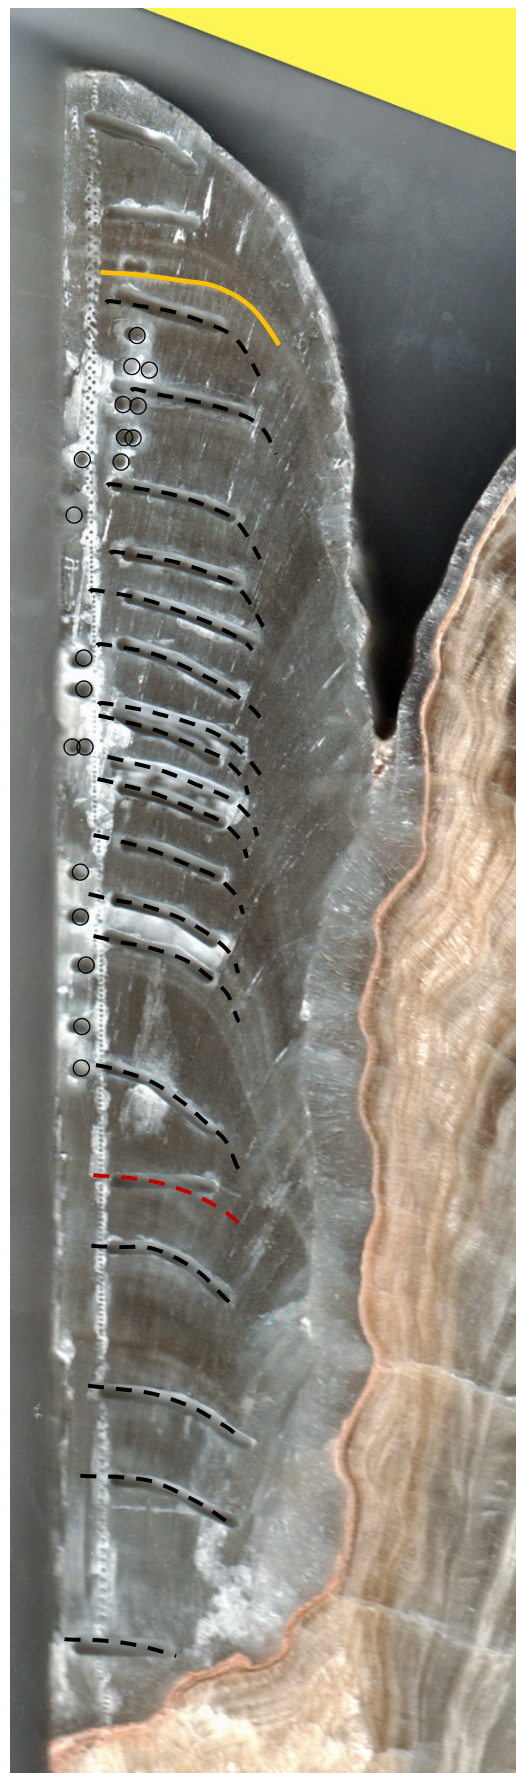

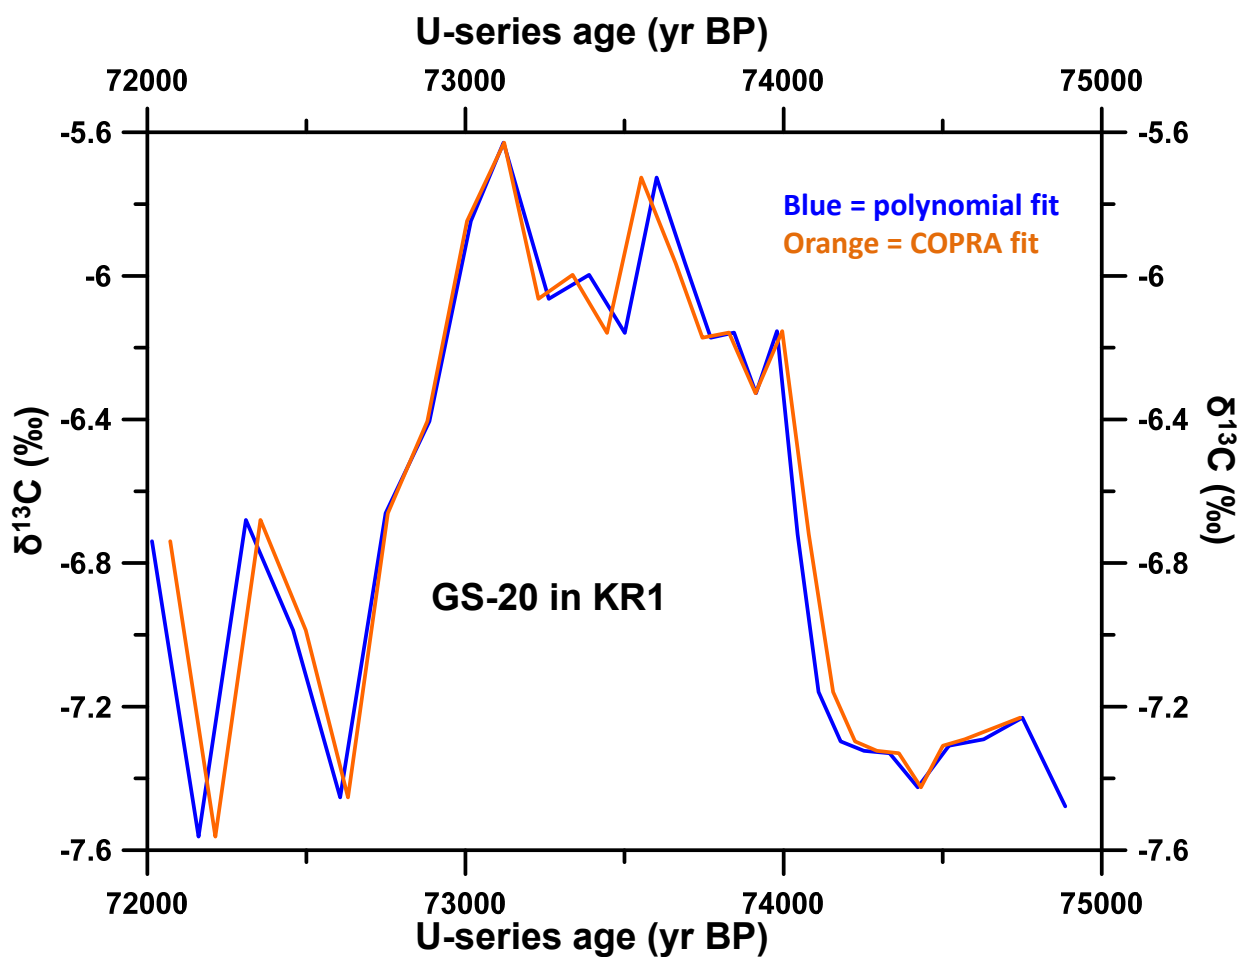

**Figure DR2.** Comparison of polynomial and COPRA curves. The polynomial curve is constructed of three polynomial equations. Both curves produce a suitable age model.

Table DR1. Uranium-series results for stalagmite KR1.

| dist.<br>(mm) | <sup>238</sup> U<br>(ng/g) | <sup>232</sup> Th<br>(pg/g) | <sup>230</sup> Th/ <sup>232</sup> Th<br>act. ratio | <sup>230</sup> Th/ <sup>238</sup> U<br>act. ratio | measured<br>$\delta^{234}\text{U}$<br>(‰) | initial<br>$\delta^{234}\text{U}$<br>(‰) | uncorrected<br>age<br>(yr BP) | corrected<br>age<br>(yrs BP) |
|---------------|----------------------------|-----------------------------|----------------------------------------------------|---------------------------------------------------|-------------------------------------------|------------------------------------------|-------------------------------|------------------------------|
| 7             | 129.7 ± 0.1                | 51 ± 37                     | 3107 ± 2256                                        | 0.403 ± 0.001                                     | 1160 ± 2                                  | 1235 ± 2                                 | 22119 ± 73                    | 22114 ± 73                   |
| 13.5          | 162.1 ± 0.1                | 64 ± 83                     | 3866 ± 5011                                        | 0.500 ± 0.002                                     | 1128 ± 2                                  | 1222 ± 2                                 | 28553 ± 144                   | 28548 ± 144                  |
| 22            | 494.5 ± 0.4                | 68 ± 32                     | 19947 ± 9309                                       | 0.893 ± 0.001                                     | 825 ± 2                                   | 1003 ± 2                                 | 69167 ± 150                   | 69165 ± 150                  |
| 31            | 141.1 ± 0.1                | 27 ± 43                     | 15582 ± 25360                                      | 0.961 ± 0.002                                     | 928 ± 2                                   | 1133 ± 2                                 | 70634 ± 178                   | 70635 ± 178                  |
| 40.5          | 396.5 ± 0.2                | 0 ± 41                      | 3442266 ± 425147589                                | 0.933 ± 0.003                                     | 856 ± 2                                   | 1047 ± 3                                 | 71566 ± 356                   | 71566 ± 356                  |
| 48            | 513.2 ± 0.5                | 108 ± 43                    | 13031 ± 5234                                       | 0.897 ± 0.001                                     | 769 ± 2                                   | 944 ± 2                                  | 72593 ± 174                   | 72590 ± 174                  |
| 51.5          | 432.6 ± 0.3                | 8 ± 45                      | 148852 ± 800384                                    | 0.950 ± 0.001                                     | 862 ± 2                                   | 1059 ± 2                                 | 73046 ± 161                   | 73046 ± 161                  |
| 57            | 279.9 ± 0.2                | 14 ± 42                     | 57672 ± 169322                                     | 0.954 ± 0.001                                     | 858 ± 2                                   | 1057 ± 2                                 | 73676 ± 164                   | 73676 ± 164                  |
| 62            | 335.8 ± 0.2                | 84 ± 38                     | 11348 ± 5168                                       | 0.934 ± 0.001                                     | 816 ± 2                                   | 1006 ± 2                                 | 73926 ± 158                   | 73922 ± 158                  |
| 63            | 341.4 ± 0.4                | 0 ± 41                      | 35796 ± 52404                                      | 0.942 ± 0.002                                     | 825 ± 2                                   | 1018 ± 2                                 | 74304 ± 214                   | 74303 ± 214                  |
| 69.5          | 309.5 ± 0.2                | 22 ± 45                     | 39776 ± 79353                                      | 0.945 ± 0.001                                     | 826 ± 2                                   | 1019 ± 2                                 | 74568 ± 176                   | 74567 ± 176                  |
| 70.5          | 252.9 ± 0.2                | 67 ± 95                     | 10841 ± 15299                                      | 0.945 ± 0.002                                     | 824 ± 2                                   | 1017 ± 2                                 | 74655 ± 265                   | 74651 ± 265                  |
| 72            | 413.1 ± 0.3                | 90 ± 58                     | 13388 ± 8622                                       | 0.949 ± 0.002                                     | 821 ± 2                                   | 1015 ± 2                                 | 75301 ± 209                   | 75298 ± 209                  |
| 77.5          | 393.7 ± 0.2                | 72 ± 45                     | 15740 ± 9807                                       | 0.946 ± 0.001                                     | 802 ± 2                                   | 994 ± 2                                  | 76062 ± 173                   | 76060 ± 173                  |
| 82.5          | 392.3 ± 0.2                | 85 ± 42                     | 13305 ± 6506                                       | 0.945 ± 0.002                                     | 779 ± 2                                   | 969 ± 2                                  | 77343 ± 256                   | 77340 ± 256                  |
| 86            | 210.2 ± 0.2                | 258 ± 35                    | 2504 ± 344                                         | 1.005 ± 0.002                                     | 877 ± 2                                   | 1093 ± 2                                 | 77868 ± 236                   | 77851 ± 236                  |
| 100           | 241.8 ± 0.1                | 33 ± 58                     | 22225 ± 38759                                      | 1.008 ± 0.003                                     | 853 ± 2                                   | 1068 ± 2                                 | 79682 ± 299                   | 79680 ± 299                  |
| 118.5         | 240.0 ± 0.1                | 31 ± 51                     | 23791 ± 38526                                      | 1.021 ± 0.001                                     | 854 ± 2                                   | 1073 ± 2                                 | 81101 ± 186                   | 81099 ± 186                  |
| 132.5         | 296.3 ± 0.1                | 29 ± 28                     | 31991 ± 31084                                      | 1.031 ± 0.001                                     | 853 ± 2                                   | 1076 ± 2                                 | 82235 ± 178                   | 82234 ± 178                  |
| 141           | 319.3 ± 0.2                | 195 ± 45                    | 6863 ± 1983                                        | 1.034 ± 0.002                                     | 846 ± 2                                   | 1069 ± 2                                 | 83043 ± 236                   | 83037 ± 236                  |
| 158           | 298.3 ± 0.3                | 27 ± 38                     | 36316 ± 52024                                      | 1.060 ± 0.002                                     | 844 ± 2                                   | 1077 ± 2                                 | 86096 ± 246                   | 86095 ± 246                  |
| 111           | 335.1 ± 0.2                | 195 ± 45                    | 5368 ± 1238                                        | 1.025 ± 0.002                                     | 853 ± 2                                   | 1074 ± 2                                 | 81581 ± 213                   | 81573 ± 213                  |

| dist.<br>(mm) | Age from<br>age model<br>(yr BP) | initial<br>$\delta^{234}\text{U}$<br>(‰) |
|---------------|----------------------------------|------------------------------------------|
| 26            | 70045                            | 1040 ± 5                                 |
| 32            | 70731                            | 1092 ± 5                                 |
| 34            | 70896                            | 1048 ± 4                                 |
| 36            | 71067                            | 1079 ± 5                                 |
| 39            | 71367                            | 1079 ± 6                                 |
| 42.5          | 71804                            | 984 ± 4                                  |
| 45            | 72161                            | 1040 ± 4                                 |
| 60            | 73913                            | 1022 ± 6                                 |
| 62            | 73922                            | 992 ± 6                                  |
| 66            | 74333                            | 1004 ± 3                                 |
| 69.5          | 74567                            | 1019 ± 2                                 |
| 80            | 76706                            | 988 ± 5                                  |
| 85            | 77668                            | 1046 ± 7                                 |
| 90            | 78449                            | 1039 ± 6                                 |
| 96            | 79236                            | 1064 ± 5                                 |
| 99.5          | 79625                            | 1044 ± 6                                 |

Yr BP = years before 2000 AD. All errors are absolute 2- $\sigma$ . An additional error of 80 years (1/2 the trench width equivalent) has been added to the measured errors shown in this table. The age data with larger errors were used in COPRA to produce the final age model. For example, an error of 294 years for the date at 63 mm of 74303 ± 214 was used for the COPRA reduction of data. Dist. = distance in mm from stalagmite top. There are growth hiatuses at 22 and 168 mm below the stalagmite top. Subsample 111 was rejected due to milling inaccuracy (see Figure DR1).

Additional  $\delta^{234}\text{U}$  values were measured from small powders (~20 mg). Ages for these were assigned from our age model using distances.

**Table DR2. Oxygen and carbon stable isotope values for stalagmite KR1.**

| dist. | Age<br>(yr BP, calc.) | $\delta^{13}\text{C}$<br>(‰) | dist. | Age<br>(yr BP, calc.) | $\delta^{13}\text{C}$<br>(‰) | dist. | Age<br>(yr BP, calc.) | $\delta^{13}\text{C}$<br>(‰) |
|-------|-----------------------|------------------------------|-------|-----------------------|------------------------------|-------|-----------------------|------------------------------|
| 23    | 69324 ± 205           | -7.04                        | 68    | 74500 ± 198           | -7.31                        | 113   | 80680 ± 199           | -7.98                        |
| 24    | 69486 ± 186           | -7.22                        | 69    | 74569 ± 217           | -7.29                        | 114   | 80757 ± 207           | -8.09                        |
| 25    | 69648 ± 172           | -6.84                        | 70    | 74744 ± 194           | -7.23                        | 115   | 80833 ± 217           | -8.30                        |
| 26    | 69811 ± 166           | -6.95                        | 71    | 75023 ± 189           | -7.48                        | 116   | 80910 ± 228           | -8.08                        |
| 27    | 69973 ± 167           | -6.85                        | 72    | 75302 ± 265           | -7.55                        | 117   | 80987 ± 240           | -7.99                        |
| 28    | 70135 ± 176           | -6.60                        | 73    | 75440 ± 222           | -7.52                        | 118   | 81063 ± 254           | -8.57                        |
| 29    | 70297 ± 192           | -6.57                        | 74    | 75579 ± 192           | -7.36                        | 119   | 81142 ± 251           | -8.04                        |
| 30    | 70459 ± 213           | -6.15                        | 75    | 75717 ± 181           | -7.45                        | 120   | 81222 ± 234           | -7.64                        |
| 31    | 70621 ± 238           | -5.85                        | 76    | 75855 ± 192           | -7.35                        | 121   | 81302 ± 218           | -7.23                        |
| 32    | 70722 ± 218           | -6.09                        | 77    | 75994 ± 222           | -7.14                        | 122   | 81382 ± 205           | -7.82                        |
| 33    | 70822 ± 207           | -6.31                        | 78    | 76186 ± 220           | -7.41                        | 123   | 81462 ± 194           | -7.76                        |
| 34    | 70923 ± 208           | -6.86                        | 79    | 76432 ± 192           | -7.36                        | 124   | 81542 ± 186           | -8.12                        |
| 35    | 71023 ± 218           | -6.62                        | 80    | 76677 ± 192           | -7.35                        | 125   | 81623 ± 181           | -8.28                        |
| 36    | 71123 ± 239           | -6.99                        | 81    | 76923 ± 222           | -7.37                        | 126   | 81703 ± 180           | -8.56                        |
| 37    | 71224 ± 266           | -6.61                        | 82    | 77169 ± 271           | -7.59                        | 127   | 81783 ± 183           | -8.35                        |
| 38    | 71324 ± 298           | -6.71                        | 83    | 77380 ± 268           | -7.12                        | 128   | 81863 ± 189           | -9.11                        |
| 39    | 71424 ± 334           | -6.95                        | 84    | 77556 ± 231           | -7.07                        | 129   | 81943 ± 198           | -8.60                        |
| 40    | 71525 ± 373           | -6.87                        | 85    | 77733 ± 239           | -7.17                        | 130   | 82023 ± 210           | -8.00                        |
| 41    | 71646 ± 366           | -7.14                        | 86    | 77909 ± 289           | -7.34                        | 131   | 82104 ± 224           | -8.31                        |
| 42    | 71788 ± 316           | -6.77                        | 87    | 78036 ± 270           | -7.42                        | 132   | 82184 ± 241           | -8.11                        |
| 43    | 71930 ± 270           | -7.97                        | 88    | 78163 ± 251           | -7.36                        | 133   | 82272 ± 236           | -8.07                        |
| 44    | 72072 ± 233           | -6.74                        | 89    | 78290 ± 234           | -7.85                        | 134   | 82369 ± 215           | -7.91                        |
| 45    | 72214 ± 210           | -7.56                        | 90    | 78416 ± 220           | -7.51                        | 135   | 82466 ± 202           | -7.72                        |
| 46    | 72356 ± 204           | -6.68                        | 91    | 78543 ± 208           | -7.61                        | 136   | 82563 ± 199           | -7.99                        |
| 47    | 72498 ± 218           | -6.99                        | 92    | 78670 ± 200           | -7.69                        | 137   | 82660 ± 207           | -8.08                        |
| 48    | 72631 ± 208           | -7.45                        | 93    | 78797 ± 195           | -7.56                        | 138   | 82757 ± 224           | -7.93                        |
| 49    | 72756 ± 176           | -6.66                        | 94    | 78924 ± 193           | -7.68                        | 139   | 82854 ± 248           | -7.94                        |
| 50    | 72881 ± 169           | -6.41                        | 95    | 79051 ± 196           | -7.57                        | 140   | 82951 ± 278           | -7.90                        |
| 51    | 73005 ± 189           | -5.85                        | 96    | 79177 ± 203           | -7.44                        | 141   | 83048 ± 312           | -7.87                        |
| 52    | 73121 ± 191           | -5.63                        | 97    | 79304 ± 213           | -7.59                        | 142   | 83227 ± 294           | -7.84                        |
| 53    | 73229 ± 165           | -6.06                        | 98    | 79431 ± 225           | -7.63                        | 143   | 83407 ± 278           | -8.25                        |
| 54    | 73337 ± 154           | -6.00                        | 99    | 79558 ± 241           | -7.85                        | 144   | 83586 ± 263           | -8.15                        |
| 55    | 73445 ± 161           | -6.16                        | 100   | 79685 ± 258           | -7.88                        | 145   | 83765 ± 250           | -7.90                        |
| 56    | 73553 ± 183           | -5.73                        | 101   | 79761 ± 245           | -8.13                        | 146   | 83944 ± 239           | -7.89                        |
| 57    | 73661 ± 215           | -5.97                        | 102   | 79838 ± 232           | -8.02                        | 147   | 84123 ± 232           | -7.96                        |
| 58    | 73744 ± 190           | -6.17                        | 103   | 79914 ± 220           | -8.15                        | 148   | 84302 ± 227           | -7.95                        |
| 59    | 73828 ± 177           | -6.16                        | 104   | 79991 ± 210           | -8.25                        | 149   | 84481 ± 225           | -7.65                        |
| 60    | 73912 ± 178           | -6.33                        | 105   | 80068 ± 201           | -8.00                        | 150   | 84660 ± 227           | -7.68                        |
| 61    | 73995 ± 193           | -6.15                        | 106   | 80144 ± 194           | -8.02                        | 151   | 84840 ± 232           | -7.75                        |
| 62    | 74079 ± 220           | -6.72                        | 107   | 80221 ± 189           | -8.08                        | 152   | 85019 ± 239           | -7.05                        |
| 63    | 74155 ± 224           | -7.16                        | 108   | 80297 ± 185           | -7.78                        | 153   | 85198 ± 250           | -7.46                        |
| 64    | 74224 ± 203           | -7.30                        | 109   | 80374 ± 184           | -7.96                        | 154   | 85377 ± 263           | -7.26                        |
| 65    | 74293 ± 190           | -7.32                        | 110   | 80451 ± 184           | -7.86                        | 155   | 85556 ± 278           | -7.64                        |
| 66    | 74362 ± 184           | -7.33                        | 111   | 80527 ± 187           | -7.74                        | 156   | 85735 ± 294           | -7.64                        |
| 67    | 74431 ± 187           | -7.43                        | 112   | 80604 ± 192           | -7.86                        | 157   | 85914 ± 312           | -7.45                        |
|       |                       |                              |       |                       |                              | 158   | 86094 ± 332           | -7.80                        |

Dist. = distance in mm beneath the stalagmite top. An age is calculated by COPRA for each subsample  $\delta^{13}\text{C}$  value, and errors are generated at 95% confidence level for the calculated ages. The U-series ages that were input into COPRA had associated 2- $\sigma$  absolute errors, and 80 years to account for sampling error was added to those.

**Table DR2. Oxygen and carbon stable isotope values for stalagmite KR1, continued.**

| dist. | Age<br>(yr BP, calc.) | $\delta^{18}\text{O}$<br>(‰) | dist. | Age<br>(yr BP, calc.) | $\delta^{18}\text{O}$<br>(‰) | dist. | Age<br>(yr BP, calc.) | $\delta^{18}\text{O}$<br>(‰) |
|-------|-----------------------|------------------------------|-------|-----------------------|------------------------------|-------|-----------------------|------------------------------|
| 23    | 69328 ± 134           | -8.65                        | 68    | 74479 ± 142           | -7.84                        | 113   | 80679 ± 142           | 0.14                         |
| 24    | 69490 ± 122           | -8.41                        | 69    | 74546 ± 159           | -7.52                        | 114   | 80756 ± 148           | 0.16                         |
| 25    | 69652 ± 115           | -8.57                        | 70    | 74723 ± 142           | -8.00                        | 115   | 80833 ± 156           | 0.18                         |
| 26    | 69814 ± 113           | -7.68                        | 71    | 75011 ± 140           | -7.63                        | 116   | 80910 ± 164           | 0.19                         |
| 27    | 69976 ± 117           | -8.64                        | 72    | 75299 ± 204           | -7.76                        | 117   | 80987 ± 173           | 0.21                         |
| 28    | 70138 ± 126           | -8.68                        | 73    | 75438 ± 169           | -7.67                        | 118   | 81065 ± 183           | 0.24                         |
| 29    | 70299 ± 140           | -8.77                        | 74    | 75577 ± 143           | -7.80                        | 119   | 81143 ± 181           | 0.27                         |
| 30    | 70461 ± 156           | -8.16                        | 75    | 75717 ± 131           | -7.42                        | 120   | 81224 ± 167           | 0.29                         |
| 31    | 70623 ± 175           | -8.54                        | 76    | 75856 ± 136           | -7.68                        | 121   | 81304 ± 155           | 0.27                         |
| 32    | 70723 ± 163           | -8.45                        | 77    | 75995 ± 158           | -7.70                        | 122   | 81384 ± 144           | 0.23                         |
| 33    | 70824 ± 159           | -8.29                        | 78    | 76189 ± 158           | -7.73                        | 123   | 81465 ± 135           | 0.22                         |
| 34    | 70924 ± 165           | -8.55                        | 79    | 76438 ± 143           | -7.85                        | 124   | 81545 ± 128           | 0.20                         |
| 35    | 71024 ± 180           | -8.41                        | 80    | 76687 ± 151           | -7.46                        | 125   | 81626 ± 123           | 0.16                         |
| 36    | 71124 ± 201           | -8.34                        | 81    | 76935 ± 179           | -7.69                        | 126   | 81706 ± 121           | 0.12                         |
| 37    | 71224 ± 228           | -8.44                        | 82    | 77184 ± 219           | -7.59                        | 127   | 81786 ± 122           | 0.11                         |
| 38    | 71324 ± 257           | -8.48                        | 83    | 77389 ± 214           | -7.59                        | 128   | 81867 ± 126           | 0.12                         |
| 39    | 71425 ± 290           | -8.64                        | 84    | 77552 ± 179           | -7.61                        | 129   | 81947 ± 132           | 0.14                         |
| 40    | 71525 ± 323           | -8.54                        | 85    | 77714 ± 184           | -7.46                        | 130   | 82027 ± 141           | 0.15                         |
| 41    | 71647 ± 316           | -8.23                        | 86    | 77876 ± 226           | -7.42                        | 131   | 82108 ± 151           | 0.14                         |
| 42    | 71792 ± 269           | -8.27                        | 87    | 78004 ± 210           | -7.62                        | 132   | 82188 ± 163           | 0.13                         |
| 43    | 71936 ± 225           | -8.07                        | 88    | 78133 ± 195           | -7.25                        | 133   | 82276 ± 160           | 0.13                         |
| 44    | 72081 ± 188           | -8.36                        | 89    | 78262 ± 181           | -7.40                        | 134   | 82372 ± 146           | 0.13                         |
| 45    | 72225 ± 160           | -8.10                        | 90    | 78390 ± 169           | -7.56                        | 135   | 82468 ± 138           | 0.17                         |
| 46    | 72370 ± 148           | -8.44                        | 91    | 78519 ± 158           | -7.46                        | 136   | 82564 ± 139           | 0.22                         |
| 47    | 72515 ± 155           | -8.29                        | 92    | 78647 ± 149           | -7.31                        | 137   | 82660 ± 148           | 0.26                         |
| 48    | 72645 ± 147           | -8.28                        | 93    | 78776 ± 142           | -7.05                        | 138   | 82756 ± 164           | 0.23                         |
| 49    | 72761 ± 123           | -8.44                        | 94    | 78904 ± 139           | -7.06                        | 139   | 82852 ± 185           | 0.19                         |
| 50    | 72877 ± 121           | -8.03                        | 95    | 79033 ± 138           | -6.87                        | 140   | 82948 ± 210           | 0.16                         |
| 51    | 72993 ± 142           | -8.27                        | 96    | 79161 ± 140           | -6.85                        | 141   | 83044 ± 237           | 0.15                         |
| 52    | 73107 ± 145           | -8.12                        | 97    | 79290 ± 145           | -6.65                        | 142   | 83223 ± 223           | 0.14                         |
| 53    | 73218 ± 123           | -8.11                        | 98    | 79419 ± 153           | -7.05                        | 143   | 83403 ± 210           | 0.11                         |
| 54    | 73329 ± 113           | -8.28                        | 99    | 79547 ± 163           | -6.93                        | 144   | 83582 ± 198           | 0.11                         |
| 55    | 73440 ± 117           | -8.28                        | 100   | 79676 ± 175           | -7.16                        | 145   | 83762 ± 188           | 0.13                         |
| 56    | 73551 ± 134           | -8.43                        | 101   | 79753 ± 166           | -7.09                        | 146   | 83941 ± 180           | 0.15                         |
| 57    | 73663 ± 160           | -8.31                        | 102   | 79830 ± 158           | -7.12                        | 147   | 84121 ± 173           | 0.16                         |
| 58    | 73744 ± 138           | -8.29                        | 103   | 79907 ± 150           | -6.71                        | 148   | 84300 ± 169           | 0.15                         |
| 59    | 73826 ± 127           | -8.57                        | 104   | 79984 ± 143           | -6.81                        | 149   | 84480 ± 167           | 0.09                         |
| 60    | 73908 ± 130           | -8.33                        | 105   | 80062 ± 137           | -6.94                        | 150   | 84659 ± 168           | 0.10                         |
| 61    | 73990 ± 146           | -8.19                        | 106   | 80139 ± 133           | -6.56                        | 151   | 84839 ± 171           | 0.18                         |
| 62    | 74071 ± 170           | -8.14                        | 107   | 80216 ± 130           | -6.96                        | 152   | 85018 ± 177           | 0.19                         |
| 63    | 74146 ± 173           | -7.75                        | 108   | 80293 ± 128           | -6.91                        | 153   | 85198 ± 184           | 0.12                         |
| 64    | 74212 ± 153           | -8.17                        | 109   | 80370 ± 128           | -6.57                        | 154   | 85377 ± 194           | 0.09                         |
| 65    | 74279 ± 138           | -7.97                        | 110   | 80447 ± 129           | -7.04                        | 155   | 85556 ± 205           | 0.11                         |
| 66    | 74346 ± 131           | -7.97                        | 111   | 80524 ± 132           | -6.97                        | 156   | 85736 ± 217           | 0.11                         |
| 67    | 74413 ± 132           | -7.50                        | 112   | 80602 ± 136           | -6.70                        | 157   | 85915 ± 231           | 0.12                         |
|       |                       |                              |       |                       |                              | 158   | 86095 ± 246           | 0.11                         |

Dist. = distance in mm beneath the stalagmite top. An age is calculated by COPRA for each subsample  $\delta^{18}\text{O}$  value, and errors are generated at 95% confidence level for the calculated ages. The U-series ages that were input into COPRA had associated 2- $\sigma$  absolute errors, and 80 years to account for sampling error was added to those.
